# Supplementary material for: Variation in sleep and metabolic function is associated with latitude and average temperature in Drosophila melanogaster
Source: PubMed Central journal article supplement (PMC5916307; doi:10.1002/ece3.3963), 2018-03-26

Figure S1

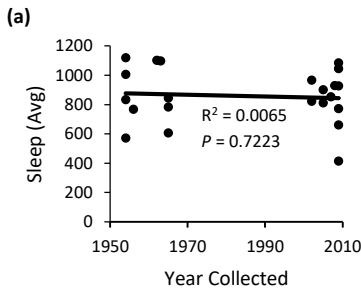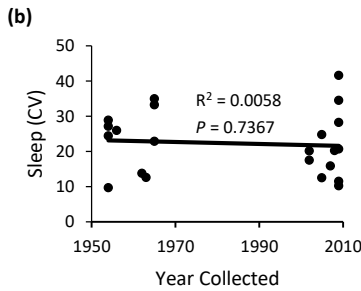

Supplement: ECE3-8-4084-s001.pdf [file ECE3-8-4084-s001.pdf]
